# Supplementary material for: Building a Foundation for Precision Onco-Nutrition: Docosahexaenoic Acid and Breast Cancer
Source: MDPI journal article supplement (doi:10.3390/cancers14010157), 2021-12-29
Supplement: s1 [file s1]

Supplemental Data

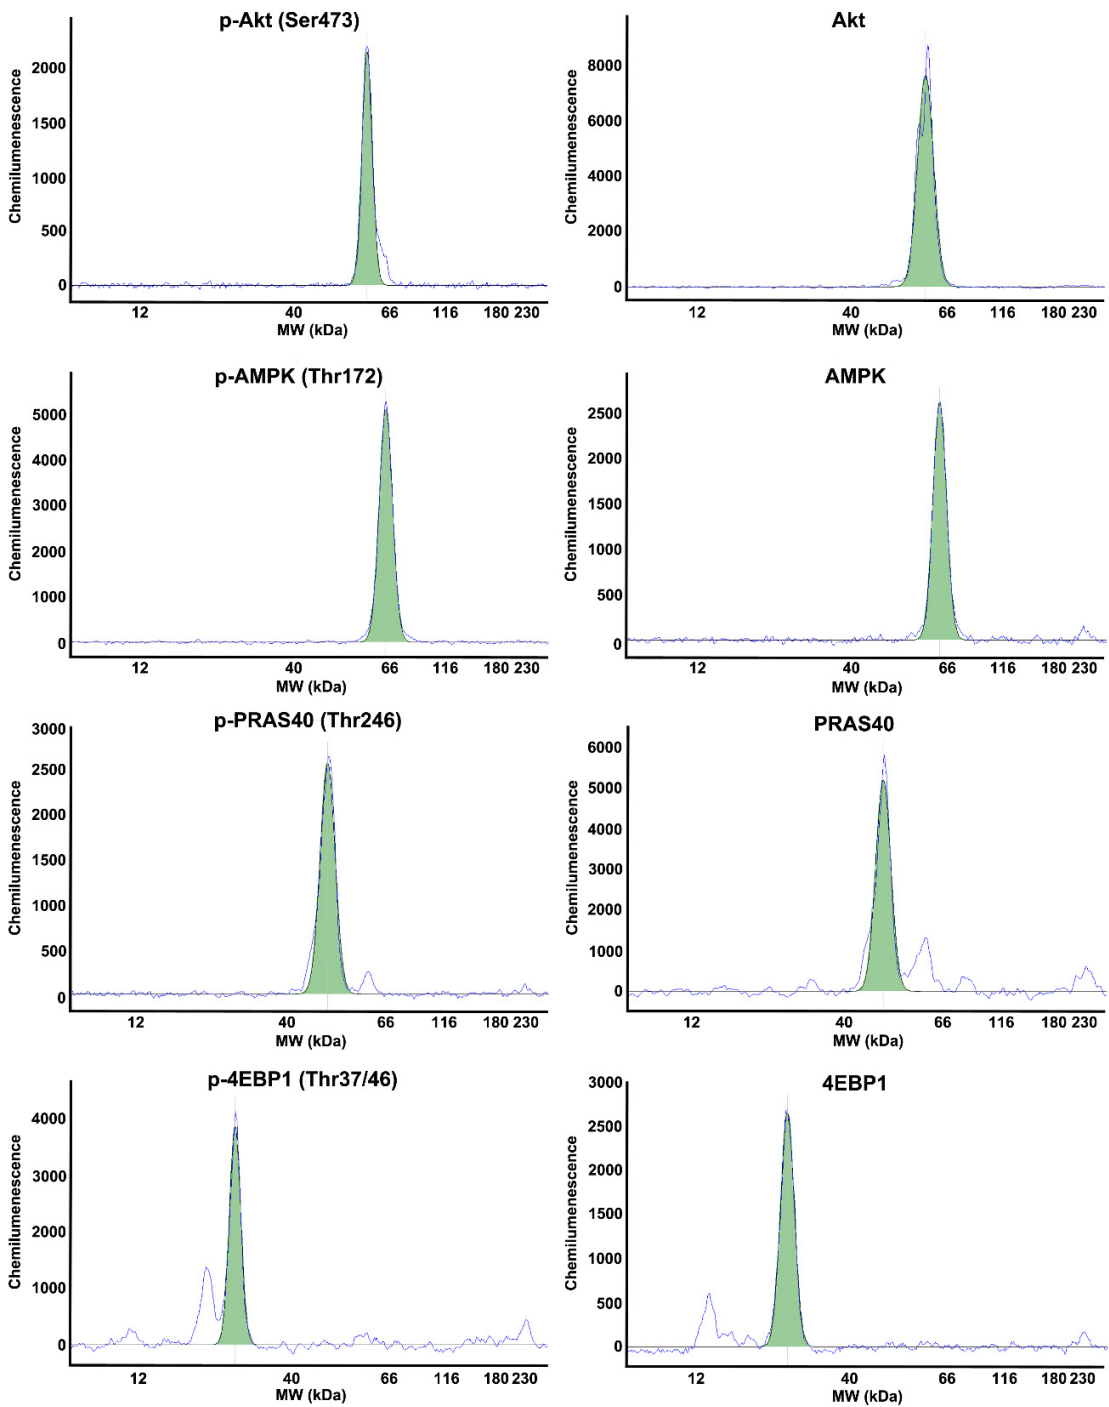

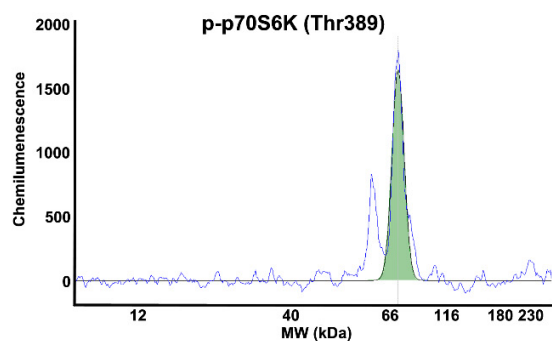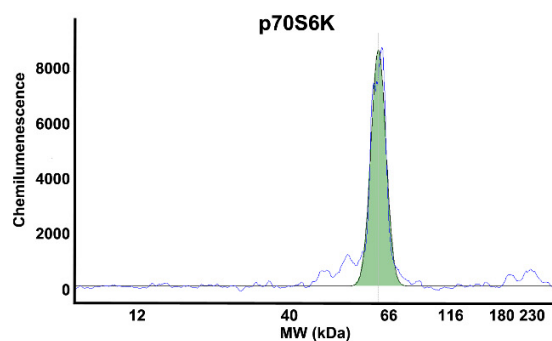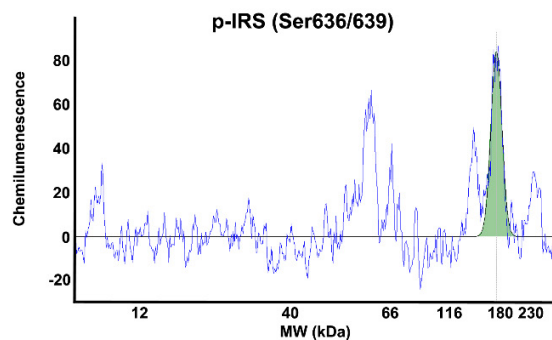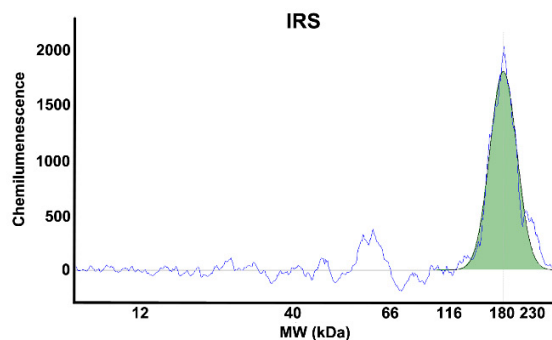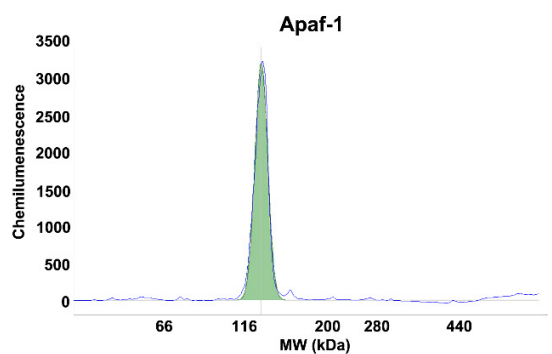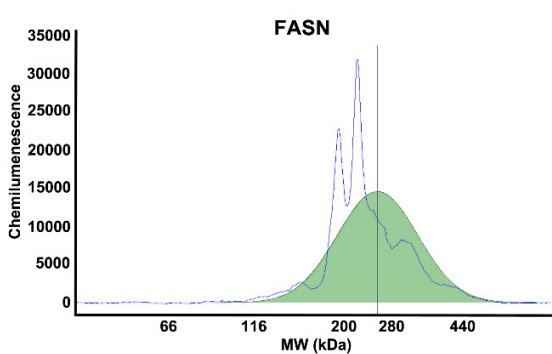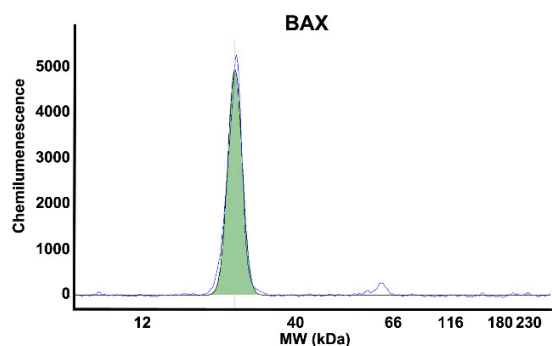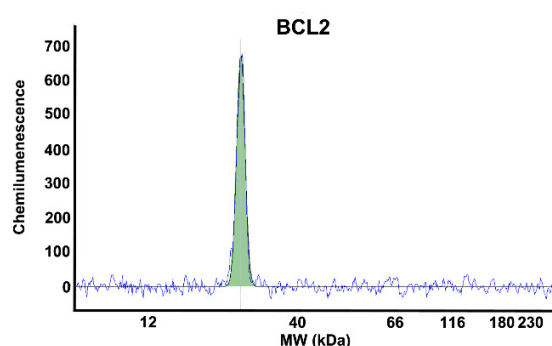

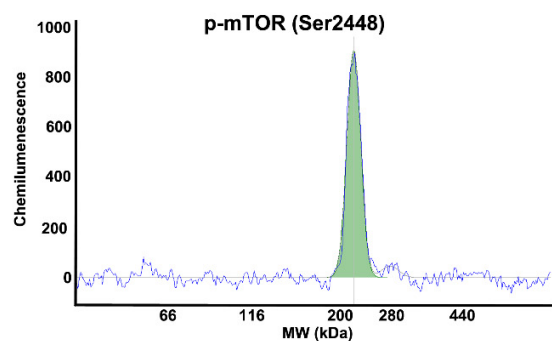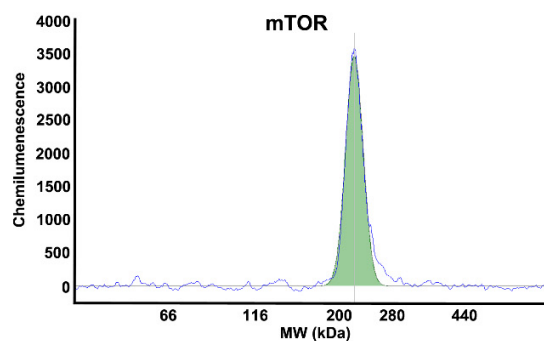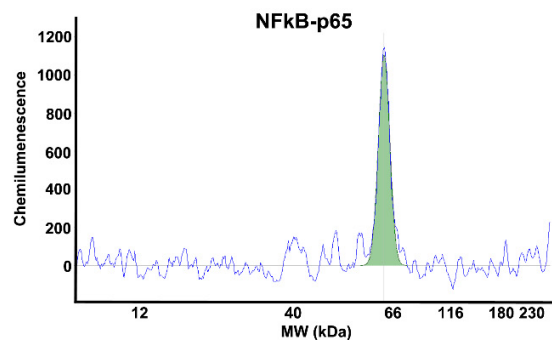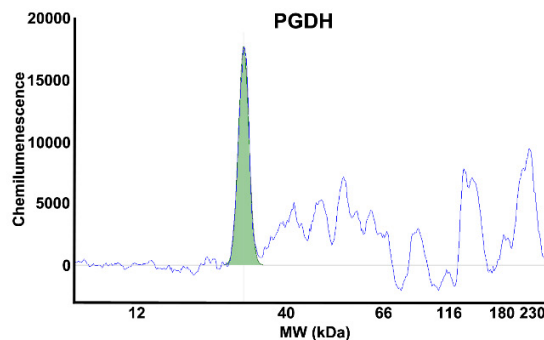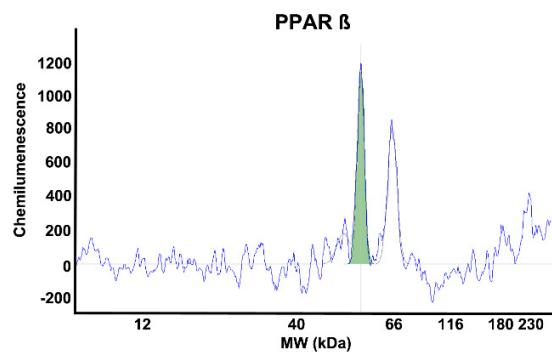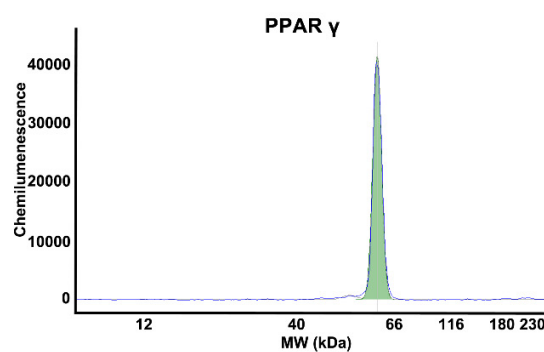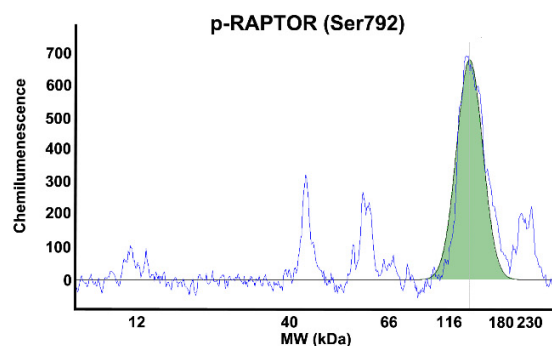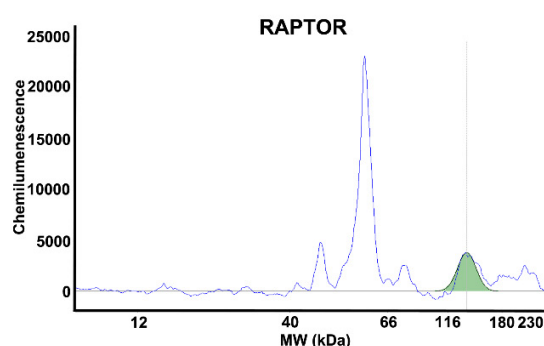

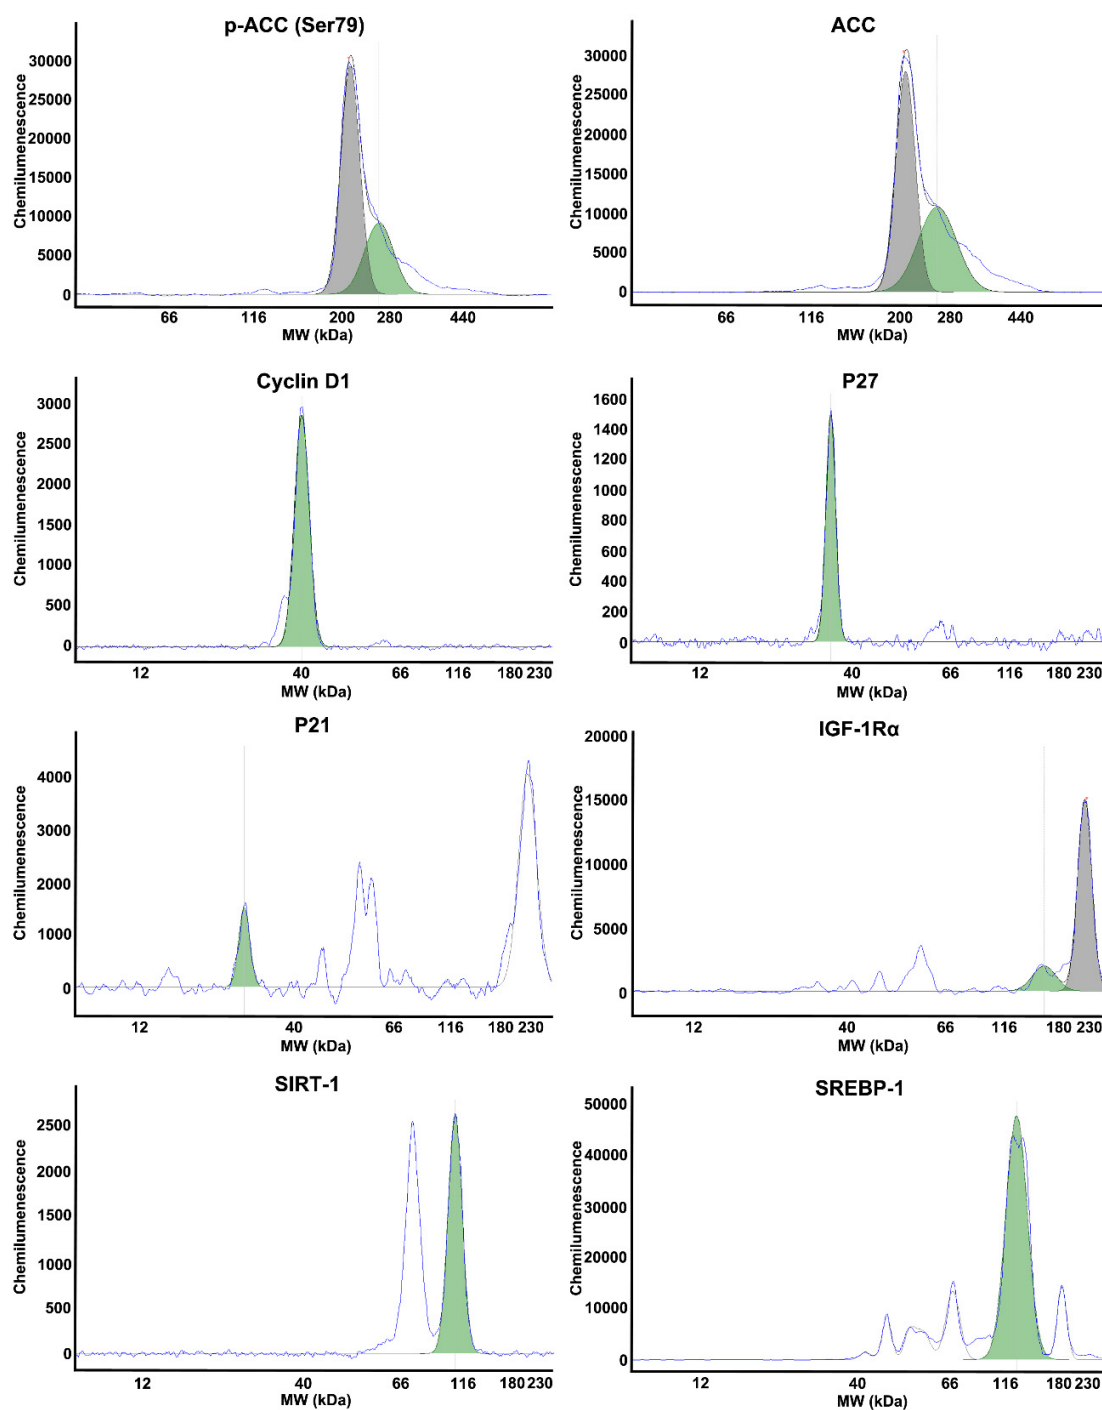

**Figure S1.** Electropherogram profiles of key primary antibodies used for western blotting.

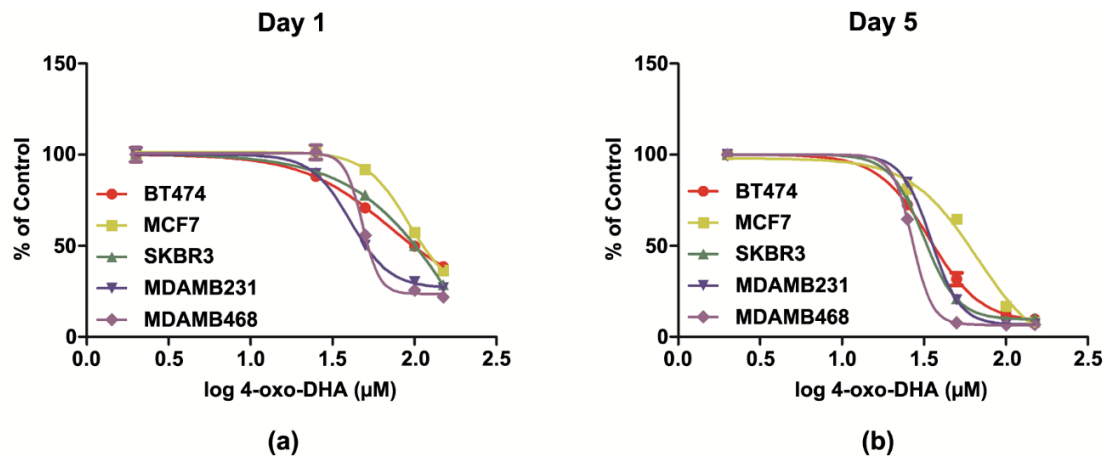

**Figure S2.** Dose- and time-dependent effects of 4-oxo-DHA on the growth of five subtype human breast cancer cells (BT474, MCF7, SKBR3, MDAMB231, and MDAMB468) graphed using the half maximal inhibitory concentration (IC<sub>50</sub>) as percent of untreated control for 1 and 5 days treatment.

## Analysis Comparison 2

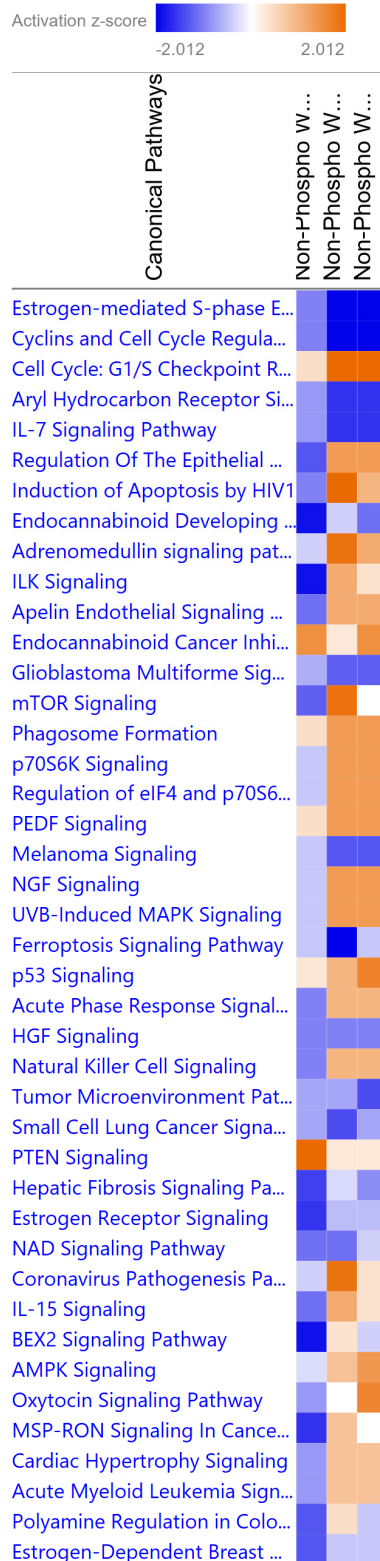

## phospho-log fold-3 cell

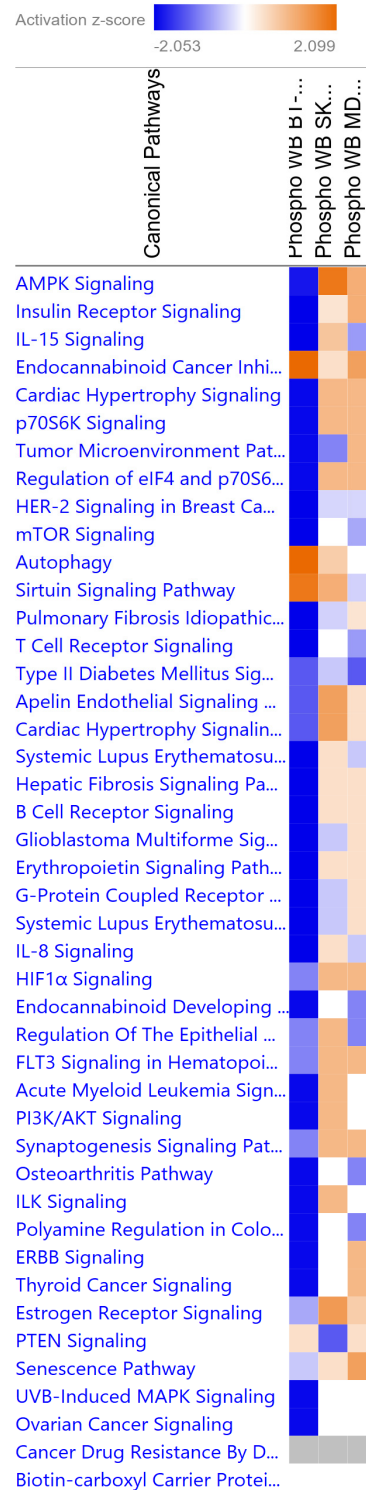

**Figure S3.** Heatmaps of canonical pathways associated with 4-oxo-DHA treatment across common molecular subtypes of breast cancer.

**Table S1.** Primary antibodies.

| <b>Antibody</b>                                         | <b>Vendor</b>     | <b>Catalog #</b> |
|---------------------------------------------------------|-------------------|------------------|
| phospho-ACC <sup>Ser79</sup>                            | Cell Signaling    | 3661             |
| ACC                                                     | Cell Signaling    | 3676             |
| $\beta$ Actin                                           | Sigma Aldrich     | A5441            |
| phospho-Akt <sup>Ser473</sup>                           | Cell Signaling    | 4058             |
| Akt                                                     | Cell Signaling    | 9272             |
| phospho-AMPK <sup>Thr172</sup>                          | Cell Signaling    | 2535             |
| AMPK                                                    | Cell Signaling    | 2603             |
| Apaf-1                                                  | Cell Signaling    | 8723             |
| Bax                                                     | BD Biosciences    | 556467           |
| Bcl-2                                                   | BD Biosciences    | 610538           |
| cyclin-D1                                               | BD Biosciences    | 556470           |
| phospho-4E-BP1 <sup>Thr37/46</sup>                      | Cell Signaling    | 9459             |
| 4E-BP1                                                  | Cell Signaling    | 9452             |
| FASN                                                    | Cell Signaling    | 3180             |
| phospho-FOXO1 <sup>Thr24</sup> & FOXO3 <sup>Thr32</sup> | Cell Signaling    | 9464             |
| FOXO1 & FOXO3                                           | Cell Signaling    | 9462             |
| GADD153                                                 | Novus Biologicals | NB600-1335       |
| GPR120                                                  | Novus Biologicals | NBP1-00858       |
| Hif-1 $\alpha$                                          | Novus Biologicals | NB100-105        |
| HMGCR                                                   | Santa Cruz        | sc-27578         |
| IGF1R $\alpha$                                          | Santa Cruz        | sc-712           |
| IGFR-1                                                  | Santa Cruz        | sc-7952          |
| phospho-IRS <sup>Ser636/639</sup>                       | Cell Signaling    | 2388             |
| IRS                                                     | Cell Signaling    | 2382             |
| phospho-mTOR <sup>Ser2448</sup>                         | Cell Signaling    | 2971             |
| mTOR                                                    | Cell Signaling    | 2972             |
| NFkB-p65                                                | Cell Signaling    | 3987             |
| p21Cip1                                                 | Santa Cruz        | sc-6246          |
| p27Kip1                                                 | BD Biosciences    | 610241           |
| Phospho-p70S6K <sup>Thr389</sup>                        | Cell Signaling    | 9205             |
| p70S6K                                                  | Cell Signaling    | 2708             |
| PARP                                                    | Cell Signaling    | 9542             |
| PGDH                                                    | Santa Cruz        | sc-48908         |
| PI3Kp110                                                | Cell Signaling    | 4255             |
| PPAR $\beta$ , $\gamma$                                 | Santa Cruz        | sc-365615        |
| phospho-PRAS40 <sup>Thr246</sup>                        | Cell Signaling    | 2997             |
| PRAS40                                                  | Cell Signaling    | 2691             |
| phospho-Raptor <sup>Ser792</sup>                        | Cell Signaling    | 2083             |
| Raptor                                                  | Cell Signaling    | 2280             |
| phospho-RB <sup>Ser780</sup>                            | Cell Signaling    | 9307             |
| RB                                                      | Cell Signaling    | 9313             |
| SIRT-1                                                  | Cell Signaling    | 9475             |
| SREBP-1                                                 | Santa Cruz        | sc-365513        |

**Table S2.** Disease and Function Annotations from IPA.

| Type | Cell Line | Diseases or Functions Annotation               | z-Score | Predicted | p-value  | # Molecules |
|------|-----------|------------------------------------------------|---------|-----------|----------|-------------|
| NP   | BT474     | Cell proliferation of breast cancer cell lines | -3.524  | Decreased | 2.88E-25 | 22          |
|      | BT474     | Proliferation of lymphocytes                   | -3.157  | Decreased | 4.49E-16 | 18          |
|      | BT474     | Proliferation of B lymphocytes                 | -3.087  | Decreased | 2.8E-15  | 13          |
|      | BT474     | Proliferation of immune cells                  | -2.958  | Decreased | 6.38E-17 | 19          |
|      | BT474     | Growth of tumor                                | -2.903  | Decreased | 7.09E-27 | 27          |
|      | SKBR3     | Inflammation of body cavity                    | -2.681  | Decreased | 8.56E-12 | 17          |
|      | SKBR3     | Proliferation of hepatocytes                   | -2.478  | Decreased | 4.27E-12 | 9           |
|      | SKBR3     | Cell cycle progression of tumor cell lines     | -2.396  | Decreased | 2.22E-22 | 17          |
|      | SKBR3     | Cell proliferation of fibroblasts              | -2.293  | Decreased | 1.17E-12 | 12          |
|      | SKBR3     | Inflammation of absolute anatomical region     | -2.263  | Decreased | 7.84E-13 | 19          |
|      | MDAMB 468 | Colony formation of cells                      | -2.749  | Decreased | 5.69E-25 | 22          |
|      | MDAMB 468 | Migration of cells                             | -2.702  | Decreased | 5.76E-21 | 29          |
|      | MDAMB 468 | Senescence of tumor cell lines                 | 2.559   | Increased | 6.99E-12 | 8           |
|      | MDAMB 468 | Differentiation of adipocytes                  | 2.513   | Increased | 4.86E-15 | 13          |
|      | MDAMB 468 | Proliferation of hepatocytes                   | -2.478  | Decreased | 4.27E-12 | 9           |
| P    | BT474     | Activation of blood cells                      | -2.449  | Decreased | 1.26E-06 | 7           |
|      | BT474     | Consumption of oxygen                          | 2.425   | Increased | 3.69E-09 | 6           |
|      | BT474     | Apoptosis of tumor cell lines                  | 2.396   | Increased | 2.74E-14 | 13          |
|      | BT474     | Size of animal                                 | -2.364  | Decreased | 1.2E-09  | 6           |
|      | BT474     | Secretion of molecule                          | -2.335  | Decreased | 9.18E-08 | 7           |
|      | SKBR3     | Proliferation of B lymphocytes                 | 2.213   | Increased | 1.54E-06 | 5           |
|      | SKBR3     | Organismal death                               | -2.14   | Decreased | 2.9E-06  | 10          |
|      | SKBR3     | Concentration of lipid                         | -2.044  | Decreased | 6.35E-09 | 9           |
|      | SKBR3     | Apoptosis of prostate cancer cell lines        | 2.011   | Increased | 1.4E-11  | 7           |
|      | MDAMB 468 | Cell death of immune cells                     | -2.804  | Decreased | 5.36E-14 | 11          |
|      | MDAMB 468 | Cell death of central nervous system cells     | -2.406  | Decreased | 1.6E-11  | 8           |
|      | MDAMB 468 | Apoptosis of leukocyte cell lines              | -2.403  | Decreased | 5.25E-12 | 7           |
|      | MDAMB 468 | Quantity of monosaccharide                     | -2.224  | Decreased | 5.86E-09 | 7           |
|      | MDAMB 468 | Invasion of breast cancer cell lines           | -2.219  | Decreased | 1.31E-07 | 6           |
| R    | BT474     | Immune response of cells                       | 2.506   | Increased | 9.75E-10 | 9           |
|      | BT474     | Activation of lymphocytes                      | -2.442  | Decreased | 3.78E-09 | 8           |
|      | BT474     | Size of animal                                 | -2.364  | Decreased | 3.44E-09 | 6           |
|      | BT474     | Secretion of molecule                          | -2.335  | Decreased | 3.24E-07 | 7           |
|      | BT474     | Concentration of lipid                         | -2.287  | Decreased | 2.53E-11 | 11          |
|      | SKBR3     | Immune response of cells                       | 2.506   | Increased | 9.75E-10 | 9           |
|      | SKBR3     | Quantity of protein in blood                   | -2.433  | Decreased | 1.62E-07 | 7           |



|           |                            |        |           |          |    |
|-----------|----------------------------|--------|-----------|----------|----|
| SKBR3     | Proliferation of neuroglia | -2.215 | Decreased | 1.03E-07 | 5  |
| SKBR3     | Accumulation of lipid      | -2.213 | Decreased | 2.65E-07 | 6  |
| SKBR3     | Oxidation of fatty acid    | 2.201  | Increased | 1.08E-10 | 7  |
| MDAMB 468 | Immune response of cells   | 2.506  | Increased | 9.75E-10 | 9  |
| MDAMB 468 | Activation of lymphocytes  | -2.442 | Decreased | 3.78E-09 | 8  |
| MDAMB 468 | Size of animal             | -2.364 | Decreased | 3.44E-09 | 6  |
| MDAMB 468 | Secretion of molecule      | -2.335 | Decreased | 3.24E-07 | 7  |
| MDAMB 468 | Concentration of lipid     | -2.287 | Decreased | 2.53E-11 | 11 |

NP, non-phosphorylated; P, phosphorylated; R, ratio.

**Table S3:** Analysis Match results (Separate excel file).
