# Supplementary material for: Building a Foundation for Precision Onco-Nutrition: Docosahexaenoic Acid and Breast Cancer
Source: Cancers (Basel). 2021 Dec 29;14(1):157. doi: 10.3390/cancers14010157 (PMC8750666; doi:10.3390/cancers14010157)
Supplement: Supplementary file 1 [file cancers-14-00157-s001.zip › Table S3.xlsx]

## Sheet: Sheet 1
Table S2:: Analysis Match results	case.targetgene	case.treatment	comparisoncontrast	comparisonid	Weblink	CP (z-score)	UR (z-score)	CN (z-score)	DE (z-score)	z-score overall score	ABS Z SCORE
25425- breast adenocarcinoma [breast] AZD8055 17141	mTOR	AZD8055	Treatment => AZD8055 vs DMSO	GSE70138.GPL20573.LINCS.test25425	https://www.ncbi.nlm.nih.gov/geo/query/acc.cgi?acc=GSE70138	-57.74	-37.8			-23.88	23.88
25832- breast adenocarcinoma [breast] celastrol 17593	multiple targets	celastrol	Treatment => celastrol vs DMSO	GSE70138.GPL20573.LINCS.test25832	https://www.ncbi.nlm.nih.gov/geo/query/acc.cgi?acc=GSE70138		-42.26	-22.36		-16.15	16.15
8069- breast adenocarcinoma [breast] CC401 26090	JNKs	CC401	Treatment => CC401 vs DMSO	GSE70138.GPL20573.LINCS.test8069	https://www.ncbi.nlm.nih.gov/geo/query/acc.cgi?acc=GSE70138		-62.68			-15.67	15.67
7251- breast adenocarcinoma [breast] CGP60474 25182	CDK1;CDK2	CGP60474	Treatment => CGP60474 vs DMSO	GSE70138.GPL20573.LINCS.test7251	https://www.ncbi.nlm.nih.gov/geo/query/acc.cgi?acc=GSE70138		-62.68			-15.67	15.67
8685- breast adenocarcinoma [breast] AZD8330 26774	MEK	AZD8330	Treatment => AZD8330 vs DMSO	GSE70138.GPL20573.LINCS.test8685	https://www.ncbi.nlm.nih.gov/geo/query/acc.cgi?acc=GSE70138		59.76			14.94	14.94
18362- breast adenocarcinoma [breast] celastrol 9293	multiple targets	celastrol	Treatment => celastrol vs DMSO	GSE70138.GPL20573.LINCS.test18362	https://www.ncbi.nlm.nih.gov/geo/query/acc.cgi?acc=GSE70138		-59.76			-14.94	14.94
7646- breast adenocarcinoma [breast] AKG2 25620	SIRT2	AKG2	Treatment => AKG2 vs DMSO	GSE70138.GPL20573.LINCS.test7646	https://www.ncbi.nlm.nih.gov/geo/query/acc.cgi?acc=GSE70138		-56.69			-14.17	14.17
25429- breast adenocarcinoma [breast] alvocidib 17145	CDK9	alvocidib	Treatment => alvocidib vs DMSO	GSE70138.GPL20573.LINCS.test25429	https://www.ncbi.nlm.nih.gov/geo/query/acc.cgi?acc=GSE70138		-56.69			-14.17	14.17
18434- breast adenocarcinoma [breast] AT7519 9373	CDK	AT7519	Treatment => AT7519 vs DMSO	GSE70138.GPL20573.LINCS.test18434	https://www.ncbi.nlm.nih.gov/geo/query/acc.cgi?acc=GSE70138		-56.69			-14.17	14.17
18314- breast adenocarcinoma [breast] BMS345541 9240	IKKbeta;IKKalpha	BMS345541	Treatment => BMS345541 vs DMSO	GSE70138.GPL20573.LINCS.test18314	https://www.ncbi.nlm.nih.gov/geo/query/acc.cgi?acc=GSE70138		-56.69			-14.17	14.17
24860- breast adenocarcinoma [breast] CGP60474 16513	CDK1;CDK2	CGP60474	Treatment => CGP60474 vs DMSO	GSE70138.GPL20573.LINCS.test24860	https://www.ncbi.nlm.nih.gov/geo/query/acc.cgi?acc=GSE70138		-56.69			-14.17	14.17
24859- breast adenocarcinoma [breast] CGP60474 16511	CDK1;CDK2	CGP60474	Treatment => CGP60474 vs DMSO	GSE70138.GPL20573.LINCS.test24859	https://www.ncbi.nlm.nih.gov/geo/query/acc.cgi?acc=GSE70138		-56.69			-14.17	14.17
18226- breast adenocarcinoma [breast] AS601245 9142	JNKs	AS601245	Treatment => AS601245 vs DMSO	GSE70138.GPL20573.LINCS.test18226	https://www.ncbi.nlm.nih.gov/geo/query/acc.cgi?acc=GSE70138				-55.47	-13.87	13.87
18413- breast adenocarcinoma [breast] A443654 9350	AKT	A443654	Treatment => A443654 vs DMSO	GSE70138.GPL20573.LINCS.test18413	https://www.ncbi.nlm.nih.gov/geo/query/acc.cgi?acc=GSE70138		-53.45			-13.36	13.36
25839- breast adenocarcinoma [breast] afatinib 17600	EGFR;HER2	afatinib	Treatment => afatinib vs DMSO	GSE70138.GPL20573.LINCS.test25839	https://www.ncbi.nlm.nih.gov/geo/query/acc.cgi?acc=GSE70138		53.45			13.36	13.36
18276- breast adenocarcinoma [breast] alvocidib 9197	CDK9	alvocidib	Treatment => alvocidib vs DMSO	GSE70138.GPL20573.LINCS.test18276	https://www.ncbi.nlm.nih.gov/geo/query/acc.cgi?acc=GSE70138		-53.45			-13.36	13.36
25596- breast adenocarcinoma [breast] AT7519 17330	CDK	AT7519	Treatment => AT7519 vs DMSO	GSE70138.GPL20573.LINCS.test25596	https://www.ncbi.nlm.nih.gov/geo/query/acc.cgi?acc=GSE70138		-53.45			-13.36	13.36
9034- breast adenocarcinoma [breast] AZD5438 27163	CDK	AZD5438	Treatment => AZD5438 vs DMSO	GSE70138.GPL20573.LINCS.test9034	https://www.ncbi.nlm.nih.gov/geo/query/acc.cgi?acc=GSE70138		-53.45			-13.36	13.36
8689- breast adenocarcinoma [breast] AZD8330 26778	MEK	AZD8330	Treatment => AZD8330 vs DMSO	GSE70138.GPL20573.LINCS.test8689	https://www.ncbi.nlm.nih.gov/geo/query/acc.cgi?acc=GSE70138		53.45			13.36	13.36
8688- breast adenocarcinoma [breast] AZD8330 26777	MEK	AZD8330	Treatment => AZD8330 vs DMSO	GSE70138.GPL20573.LINCS.test8688	https://www.ncbi.nlm.nih.gov/geo/query/acc.cgi?acc=GSE70138		53.45			13.36	13.36
17741- breast adenocarcinoma [breast] AZD8330 8603	MEK	AZD8330	Treatment => AZD8330 vs DMSO	GSE70138.GPL20573.LINCS.test17741	https://www.ncbi.nlm.nih.gov/geo/query/acc.cgi?acc=GSE70138		53.45			13.36	13.36
7250- breast adenocarcinoma [breast] CGP60474 25181	CDK1;CDK2	CGP60474	Treatment => CGP60474 vs DMSO	GSE70138.GPL20573.LINCS.test7250	https://www.ncbi.nlm.nih.gov/geo/query/acc.cgi?acc=GSE70138		-53.45			-13.36	13.36
7246- breast adenocarcinoma [breast] CGP60474 25176	CDK1;CDK2	CGP60474	Treatment => CGP60474 vs DMSO	GSE70138.GPL20573.LINCS.test7246	https://www.ncbi.nlm.nih.gov/geo/query/acc.cgi?acc=GSE70138		-53.45			-13.36	13.36
25428- breast adenocarcinoma [breast] alvocidib 17144	CDK9	alvocidib	Treatment => alvocidib vs DMSO	GSE70138.GPL20573.LINCS.test25428	https://www.ncbi.nlm.nih.gov/geo/query/acc.cgi?acc=GSE70138		-50			-12.5	12.5
25430- breast adenocarcinoma [breast] alvocidib 17147	CDK9	alvocidib	Treatment => alvocidib vs DMSO	GSE70138.GPL20573.LINCS.test25430	https://www.ncbi.nlm.nih.gov/geo/query/acc.cgi?acc=GSE70138		-50			-12.5	12.5
18275- breast adenocarcinoma [breast] alvocidib 9196	CDK9	alvocidib	Treatment => alvocidib vs DMSO	GSE70138.GPL20573.LINCS.test18275	https://www.ncbi.nlm.nih.gov/geo/query/acc.cgi?acc=GSE70138		-50			-12.5	12.5
18272- breast adenocarcinoma [breast] alvocidib 9193	CDK9	alvocidib	Treatment => alvocidib vs DMSO	GSE70138.GPL20573.LINCS.test18272	https://www.ncbi.nlm.nih.gov/geo/query/acc.cgi?acc=GSE70138		-50			-12.5	12.5
8891- breast adenocarcinoma [breast] alvocidib 27003	CDK9	alvocidib	Treatment => alvocidib vs DMSO	GSE70138.GPL20573.LINCS.test8891	https://www.ncbi.nlm.nih.gov/geo/query/acc.cgi?acc=GSE70138		-50			-12.5	12.5
17821- breast adenocarcinoma [breast] apitolisib 8692	PI3K;mTOR	apitolisib	Treatment => apitolisib vs DMSO	GSE70138.GPL20573.LINCS.test17821	https://www.ncbi.nlm.nih.gov/geo/query/acc.cgi?acc=GSE70138		-50			-12.5	12.5
17934- breast adenocarcinoma [breast] AS601245 8817	JNKs	AS601245	Treatment => AS601245 vs DMSO	GSE70138.GPL20573.LINCS.test17934	https://www.ncbi.nlm.nih.gov/geo/query/acc.cgi?acc=GSE70138		-50			-12.5	12.5
18435- breast adenocarcinoma [breast] AT7519 9374	CDK	AT7519	Treatment => AT7519 vs DMSO	GSE70138.GPL20573.LINCS.test18435	https://www.ncbi.nlm.nih.gov/geo/query/acc.cgi?acc=GSE70138		-50			-12.5	12.5
25595- breast adenocarcinoma [breast] AT7519 17329	CDK	AT7519	Treatment => AT7519 vs DMSO	GSE70138.GPL20573.LINCS.test25595	https://www.ncbi.nlm.nih.gov/geo/query/acc.cgi?acc=GSE70138		-50			-12.5	12.5
9053- breast adenocarcinoma [breast] AT7519 27184	CDK	AT7519	Treatment => AT7519 vs DMSO	GSE70138.GPL20573.LINCS.test9053	https://www.ncbi.nlm.nih.gov/geo/query/acc.cgi?acc=GSE70138		-50			-12.5	12.5
18416- breast adenocarcinoma [breast] AZD5438 9353	CDK	AZD5438	Treatment => AZD5438 vs DMSO	GSE70138.GPL20573.LINCS.test18416	https://www.ncbi.nlm.nih.gov/geo/query/acc.cgi?acc=GSE70138		-50			-12.5	12.5
9390- breast adenocarcinoma [breast] AZD7762 27558	CHK	AZD7762	Treatment => AZD7762 vs DMSO	GSE70138.GPL20573.LINCS.test9390	https://www.ncbi.nlm.nih.gov/geo/query/acc.cgi?acc=GSE70138		50			12.5	12.5
8687- breast adenocarcinoma [breast] AZD8330 26776	MEK	AZD8330	Treatment => AZD8330 vs DMSO	GSE70138.GPL20573.LINCS.test8687	https://www.ncbi.nlm.nih.gov/geo/query/acc.cgi?acc=GSE70138		50			12.5	12.5
7543- breast adenocarcinoma [breast] BGJ398 25506	FGFR	BGJ398	Treatment => BGJ398 vs DMSO	GSE70138.GPL20573.LINCS.test7543	https://www.ncbi.nlm.nih.gov/geo/query/acc.cgi?acc=GSE70138		-50			-12.5	12.5
7542- breast adenocarcinoma [breast] BGJ398 25505	FGFR	BGJ398	Treatment => BGJ398 vs DMSO	GSE70138.GPL20573.LINCS.test7542	https://www.ncbi.nlm.nih.gov/geo/query/acc.cgi?acc=GSE70138		-50			-12.5	12.5
25720- breast adenocarcinoma [breast] BMS345541 17469	IKKbeta;IKKalpha	BMS345541	Treatment => BMS345541 vs DMSO	GSE70138.GPL20573.LINCS.test25720	https://www.ncbi.nlm.nih.gov/geo/query/acc.cgi?acc=GSE70138		-50			-12.5	12.5
25321- breast adenocarcinoma [breast] BX912 17026	PDK1	BX912	Treatment => BX912 vs DMSO	GSE70138.GPL20573.LINCS.test25321	https://www.ncbi.nlm.nih.gov/geo/query/acc.cgi?acc=GSE70138		-50			-12.5	12.5
7978- breast adenocarcinoma [breast] c-Met_RON kinase inhibitor 25988	c-MET;RON	c-Met/RON kinase inhibitor	Treatment => c-Met/RON kinase inhibitor vs DMSO	GSE70138.GPL20573.LINCS.test7978	https://www.ncbi.nlm.nih.gov/geo/query/acc.cgi?acc=GSE70138		-50			-12.5	12.5
18662- breast adenocarcinoma [breast] celastrol 9626	multiple targets	celastrol	Treatment => celastrol vs DMSO	GSE70138.GPL20573.LINCS.test18662	https://www.ncbi.nlm.nih.gov/geo/query/acc.cgi?acc=GSE70138		-50			-12.5	12.5
8984- breast adenocarcinoma [breast] celastrol 27106	multiple targets	celastrol	Treatment => celastrol vs DMSO	GSE70138.GPL20573.LINCS.test8984	https://www.ncbi.nlm.nih.gov/geo/query/acc.cgi?acc=GSE70138		-50			-12.5	12.5
25083- breast adenocarcinoma [breast] CGP60474 16761	CDK1;CDK2	CGP60474	Treatment => CGP60474 vs DMSO	GSE70138.GPL20573.LINCS.test25083	https://www.ncbi.nlm.nih.gov/geo/query/acc.cgi?acc=GSE70138		-50			-12.5	12.5
8545- breast adenocarcinoma [breast] CGP60474 26619	CDK1;CDK2	CGP60474	Treatment => CGP60474 vs DMSO	GSE70138.GPL20573.LINCS.test8545	https://www.ncbi.nlm.nih.gov/geo/query/acc.cgi?acc=GSE70138		-50			-12.5	12.5
25084- breast adenocarcinoma [breast] CGP60474 16762	CDK1;CDK2	CGP60474	Treatment => CGP60474 vs DMSO	GSE70138.GPL20573.LINCS.test25084	https://www.ncbi.nlm.nih.gov/geo/query/acc.cgi?acc=GSE70138		-50			-12.5	12.5
18410- breast adenocarcinoma [breast] A443654 9347	AKT	A443654	Treatment => A443654 vs DMSO	GSE70138.GPL20573.LINCS.test18410	https://www.ncbi.nlm.nih.gov/geo/query/acc.cgi?acc=GSE70138		-46.29			-11.57	11.57
9029- breast adenocarcinoma [breast] A443654 27157	AKT	A443654	Treatment => A443654 vs DMSO	GSE70138.GPL20573.LINCS.test9029	https://www.ncbi.nlm.nih.gov/geo/query/acc.cgi?acc=GSE70138		-46.29			-11.57	11.57
7053- breast adenocarcinoma [breast] A443654 24962	AKT	A443654	Treatment => A443654 vs DMSO	GSE70138.GPL20573.LINCS.test7053	https://www.ncbi.nlm.nih.gov/geo/query/acc.cgi?acc=GSE70138		-46.29			-11.57	11.57
18412- breast adenocarcinoma [breast] A443654 9349	AKT	A443654	Treatment => A443654 vs DMSO	GSE70138.GPL20573.LINCS.test18412	https://www.ncbi.nlm.nih.gov/geo/query/acc.cgi?acc=GSE70138		-46.29			-11.57	11.57
18411- breast adenocarcinoma [breast] A443654 9348	AKT	A443654	Treatment => A443654 vs DMSO	GSE70138.GPL20573.LINCS.test18411	https://www.ncbi.nlm.nih.gov/geo/query/acc.cgi?acc=GSE70138		-46.29			-11.57	11.57
25879- breast adenocarcinoma [breast] A443654 17644	AKT	A443654	Treatment => A443654 vs DMSO	GSE70138.GPL20573.LINCS.test25879	https://www.ncbi.nlm.nih.gov/geo/query/acc.cgi?acc=GSE70138		-46.29			-11.57	11.57
17969- breast adenocarcinoma [breast] AKT inhibitor VIII 8855	AKT	AKT inhibitor VIII	Treatment => AKT inhibitor VIII vs DMSO	GSE70138.GPL20573.LINCS.test17969	https://www.ncbi.nlm.nih.gov/geo/query/acc.cgi?acc=GSE70138		-46.29			-11.57	11.57
8890- breast adenocarcinoma [breast] alvocidib 27002	CDK9	alvocidib	Treatment => alvocidib vs DMSO	GSE70138.GPL20573.LINCS.test8890	https://www.ncbi.nlm.nih.gov/geo/query/acc.cgi?acc=GSE70138		-46.29			-11.57	11.57
25719- breast adenocarcinoma [breast] alvocidib 17467	CDK9	alvocidib	Treatment => alvocidib vs DMSO	GSE70138.GPL20573.LINCS.test25719	https://www.ncbi.nlm.nih.gov/geo/query/acc.cgi?acc=GSE70138		-46.29			-11.57	11.57
9184- breast adenocarcinoma [breast] alvocidib 27329	CDK9	alvocidib	Treatment => alvocidib vs DMSO	GSE70138.GPL20573.LINCS.test9184	https://www.ncbi.nlm.nih.gov/geo/query/acc.cgi?acc=GSE70138		-46.29			-11.57	11.57
18277- breast adenocarcinoma [breast] alvocidib 9198	CDK9	alvocidib	Treatment => alvocidib vs DMSO	GSE70138.GPL20573.LINCS.test18277	https://www.ncbi.nlm.nih.gov/geo/query/acc.cgi?acc=GSE70138		-46.29			-11.57	11.57
18273- breast adenocarcinoma [breast] alvocidib 9194	CDK9	alvocidib	Treatment => alvocidib vs DMSO	GSE70138.GPL20573.LINCS.test18273	https://www.ncbi.nlm.nih.gov/geo/query/acc.cgi?acc=GSE70138		-46.29			-11.57	11.57
8893- breast adenocarcinoma [breast] alvocidib 27005	CDK9	alvocidib	Treatment => alvocidib vs DMSO	GSE70138.GPL20573.LINCS.test8893	https://www.ncbi.nlm.nih.gov/geo/query/acc.cgi?acc=GSE70138		-46.29			-11.57	11.57
18274- breast adenocarcinoma [breast] alvocidib 9195	CDK9	alvocidib	Treatment => alvocidib vs DMSO	GSE70138.GPL20573.LINCS.test18274	https://www.ncbi.nlm.nih.gov/geo/query/acc.cgi?acc=GSE70138		-46.29			-11.57	11.57
25427- breast adenocarcinoma [breast] alvocidib 17143	CDK9	alvocidib	Treatment => alvocidib vs DMSO	GSE70138.GPL20573.LINCS.test25427	https://www.ncbi.nlm.nih.gov/geo/query/acc.cgi?acc=GSE70138		-46.29			-11.57	11.57
17936- breast adenocarcinoma [breast] AS601245 8819	JNKs	AS601245	Treatment => AS601245 vs DMSO	GSE70138.GPL20573.LINCS.test17936	https://www.ncbi.nlm.nih.gov/geo/query/acc.cgi?acc=GSE70138		-46.29			-11.57	11.57
8550- breast adenocarcinoma [breast] AS601245 26625	JNKs	AS601245	Treatment => AS601245 vs DMSO	GSE70138.GPL20573.LINCS.test8550	https://www.ncbi.nlm.nih.gov/geo/query/acc.cgi?acc=GSE70138		-46.29			-11.57	11.57
25090- breast adenocarcinoma [breast] AS601245 16769	JNKs	AS601245	Treatment => AS601245 vs DMSO	GSE70138.GPL20573.LINCS.test25090	https://www.ncbi.nlm.nih.gov/geo/query/acc.cgi?acc=GSE70138		-46.29			-11.57	11.57
18437- breast adenocarcinoma [breast] AT7519 9376	CDK	AT7519	Treatment => AT7519 vs DMSO	GSE70138.GPL20573.LINCS.test18437	https://www.ncbi.nlm.nih.gov/geo/query/acc.cgi?acc=GSE70138		-46.29			-11.57	11.57
7075- breast adenocarcinoma [breast] AT7519 24986	CDK	AT7519	Treatment => AT7519 vs DMSO	GSE70138.GPL20573.LINCS.test7075	https://www.ncbi.nlm.nih.gov/geo/query/acc.cgi?acc=GSE70138		-46.29			-11.57	11.57
18436- breast adenocarcinoma [breast] AT7519 9375	CDK	AT7519	Treatment => AT7519 vs DMSO	GSE70138.GPL20573.LINCS.test18436	https://www.ncbi.nlm.nih.gov/geo/query/acc.cgi?acc=GSE70138		-46.29			-11.57	11.57
9190- breast adenocarcinoma [breast] AZD5438 27336	CDK	AZD5438	Treatment => AZD5438 vs DMSO	GSE70138.GPL20573.LINCS.test9190	https://www.ncbi.nlm.nih.gov/geo/query/acc.cgi?acc=GSE70138		-46.29			-11.57	11.57
25724- breast adenocarcinoma [breast] AZD5438 17473	CDK	AZD5438	Treatment => AZD5438 vs DMSO	GSE70138.GPL20573.LINCS.test25724	https://www.ncbi.nlm.nih.gov/geo/query/acc.cgi?acc=GSE70138		-46.29			-11.57	11.57
25613- breast adenocarcinoma [breast] AZD7762 17350	CHK	AZD7762	Treatment => AZD7762 vs DMSO	GSE70138.GPL20573.LINCS.test25613	https://www.ncbi.nlm.nih.gov/geo/query/acc.cgi?acc=GSE70138		-46.29			-11.57	11.57
7095- breast adenocarcinoma [breast] AZD7762 25008	CHK	AZD7762	Treatment => AZD7762 vs DMSO	GSE70138.GPL20573.LINCS.test7095	https://www.ncbi.nlm.nih.gov/geo/query/acc.cgi?acc=GSE70138		46.29			11.57	11.57
18269- breast adenocarcinoma [breast] AZD8055 9189	mTOR	AZD8055	Treatment => AZD8055 vs DMSO	GSE70138.GPL20573.LINCS.test18269	https://www.ncbi.nlm.nih.gov/geo/query/acc.cgi?acc=GSE70138		-46.29			-11.57	11.57
18267- breast adenocarcinoma [breast] AZD8055 9187	mTOR	AZD8055	Treatment => AZD8055 vs DMSO	GSE70138.GPL20573.LINCS.test18267	https://www.ncbi.nlm.nih.gov/geo/query/acc.cgi?acc=GSE70138		-46.29			-11.57	11.57
18266- breast adenocarcinoma [breast] AZD8055 9186	mTOR	AZD8055	Treatment => AZD8055 vs DMSO	GSE70138.GPL20573.LINCS.test18266	https://www.ncbi.nlm.nih.gov/geo/query/acc.cgi?acc=GSE70138		-46.29			-11.57	11.57
25012- breast adenocarcinoma [breast] BEZ235 16683	PI3K;mTOR	BEZ235	Treatment => BEZ235 vs DMSO	GSE70138.GPL20573.LINCS.test25012	https://www.ncbi.nlm.nih.gov/geo/query/acc.cgi?acc=GSE70138		-46.29			-11.57	11.57
17862- breast adenocarcinoma [breast] BEZ235 8737	PI3K;mTOR	BEZ235	Treatment => BEZ235 vs DMSO	GSE70138.GPL20573.LINCS.test17862	https://www.ncbi.nlm.nih.gov/geo/query/acc.cgi?acc=GSE70138		-46.29			-11.57	11.57
18068- breast adenocarcinoma [breast] BKM120 8966	PI3K	BKM120	Treatment => BKM120 vs DMSO	GSE70138.GPL20573.LINCS.test18068	https://www.ncbi.nlm.nih.gov/geo/query/acc.cgi?acc=GSE70138		-46.29			-11.57	11.57
18381- breast adenocarcinoma [breast] canertinib 9314	EGFR;HER2;ErbB4	canertinib	Treatment => canertinib vs DMSO	GSE70138.GPL20573.LINCS.test18381	https://www.ncbi.nlm.nih.gov/geo/query/acc.cgi?acc=GSE70138		46.29			11.57	11.57
7247- breast adenocarcinoma [breast] CGP60474 25177	CDK1;CDK2	CGP60474	Treatment => CGP60474 vs DMSO	GSE70138.GPL20573.LINCS.test7247	https://www.ncbi.nlm.nih.gov/geo/query/acc.cgi?acc=GSE70138		-46.29			-11.57	11.57
8306- breast adenocarcinoma [breast] CGP60474 26354	CDK1;CDK2	CGP60474	Treatment => CGP60474 vs DMSO	GSE70138.GPL20573.LINCS.test8306	https://www.ncbi.nlm.nih.gov/geo/query/acc.cgi?acc=GSE70138		-46.29			-11.57	11.57
8544- breast adenocarcinoma [breast] CGP60474 26618	CDK1;CDK2	CGP60474	Treatment => CGP60474 vs DMSO	GSE70138.GPL20573.LINCS.test8544	https://www.ncbi.nlm.nih.gov/geo/query/acc.cgi?acc=GSE70138		-46.29			-11.57	11.57
8659- breast adenocarcinoma [breast] CGP60474 26745	CDK1;CDK2	CGP60474	Treatment => CGP60474 vs DMSO	GSE70138.GPL20573.LINCS.test8659	https://www.ncbi.nlm.nih.gov/geo/query/acc.cgi?acc=GSE70138		46.29			11.57	11.57
25524- breast adenocarcinoma [breast] CGP60474 17251	CDK1;CDK2	CGP60474	Treatment => CGP60474 vs DMSO	GSE70138.GPL20573.LINCS.test25524	https://www.ncbi.nlm.nih.gov/geo/query/acc.cgi?acc=GSE70138		-46.29			-11.57	11.57
7249- breast adenocarcinoma [breast] CGP60474 25179	CDK1;CDK2	CGP60474	Treatment => CGP60474 vs DMSO	GSE70138.GPL20573.LINCS.test7249	https://www.ncbi.nlm.nih.gov/geo/query/acc.cgi?acc=GSE70138		-46.29			-11.57	11.57
3507- breast adenocarcinoma [breast] compound E 21022	gamma-secretase	compound E	Treatment => compound E vs DMSO	GSE70138.GPL20573.LINCS.test3507	https://www.ncbi.nlm.nih.gov/geo/query/acc.cgi?acc=GSE70138		46.29			11.57	11.57
25104- breast adenocarcinoma [breast] crizotinib 16785	ALK and ROS1	crizotinib	Treatment => crizotinib vs DMSO	GSE70138.GPL20573.LINCS.test25104	https://www.ncbi.nlm.nih.gov/geo/query/acc.cgi?acc=GSE70138		-46.29			-11.57	11.57
17927- breast adenocarcinoma [breast] crizotinib 8809	ALK and ROS1	crizotinib	Treatment => crizotinib vs DMSO	GSE70138.GPL20573.LINCS.test17927	https://www.ncbi.nlm.nih.gov/geo/query/acc.cgi?acc=GSE70138		-46.29			-11.57	11.57
8006- breast adenocarcinoma [breast] dabrafenib 26021	B-RAF	dabrafenib	Treatment => dabrafenib vs DMSO	GSE70138.GPL20573.LINCS.test8006	https://www.ncbi.nlm.nih.gov/geo/query/acc.cgi?acc=GSE70138		-46.29			-11.57	11.57
7680- breast adenocarcinoma [breast] 5-azacytidine 25658	nucleotide analog	5-azacytidine	Treatment => 5-azacytidine vs DMSO	GSE70138.GPL20573.LINCS.test7680	https://www.ncbi.nlm.nih.gov/geo/query/acc.cgi?acc=GSE70138		-42.26			-10.56	10.56
9030- breast adenocarcinoma [breast] A443654 27159	AKT	A443654	Treatment => A443654 vs DMSO	GSE70138.GPL20573.LINCS.test9030	https://www.ncbi.nlm.nih.gov/geo/query/acc.cgi?acc=GSE70138		-42.26			-10.56	10.56
9028- breast adenocarcinoma [breast] A443654 27156	AKT	A443654	Treatment => A443654 vs DMSO	GSE70138.GPL20573.LINCS.test9028	https://www.ncbi.nlm.nih.gov/geo/query/acc.cgi?acc=GSE70138		-42.26			-10.56	10.56
18667- breast adenocarcinoma [breast] afatinib 9631	EGFR;HER2	afatinib	Treatment => afatinib vs DMSO	GSE70138.GPL20573.LINCS.test18667	https://www.ncbi.nlm.nih.gov/geo/query/acc.cgi?acc=GSE70138		-42.26			-10.56	10.56
17666- breast adenocarcinoma [breast] AKT inhibitor VIII 8519	AKT	AKT inhibitor VIII	Treatment => AKT inhibitor VIII vs DMSO	GSE70138.GPL20573.LINCS.test17666	https://www.ncbi.nlm.nih.gov/geo/query/acc.cgi?acc=GSE70138		-42.26			-10.56	10.56
18561- breast adenocarcinoma [breast] alvocidib 9514	CDK9	alvocidib	Treatment => alvocidib vs DMSO	GSE70138.GPL20573.LINCS.test18561	https://www.ncbi.nlm.nih.gov/geo/query/acc.cgi?acc=GSE70138		-42.26			-10.56	10.56
9201- breast adenocarcinoma [breast] alvocidib 27349	CDK9	alvocidib	Treatment => alvocidib vs DMSO	GSE70138.GPL20573.LINCS.test9201	https://www.ncbi.nlm.nih.gov/geo/query/acc.cgi?acc=GSE70138		42.26			10.56	10.56
17817- breast adenocarcinoma [breast] apitolisib 8687	PI3K;mTOR	apitolisib	Treatment => apitolisib vs DMSO	GSE70138.GPL20573.LINCS.test17817	https://www.ncbi.nlm.nih.gov/geo/query/acc.cgi?acc=GSE70138		-42.26			-10.56	10.56
25091- breast adenocarcinoma [breast] AS601245 16770	JNKs	AS601245	Treatment => AS601245 vs DMSO	GSE70138.GPL20573.LINCS.test25091	https://www.ncbi.nlm.nih.gov/geo/query/acc.cgi?acc=GSE70138		-42.26			-10.56	10.56
8551- breast adenocarcinoma [breast] AS601245 26626	JNKs	AS601245	Treatment => AS601245 vs DMSO	GSE70138.GPL20573.LINCS.test8551	https://www.ncbi.nlm.nih.gov/geo/query/acc.cgi?acc=GSE70138		-42.26			-10.56	10.56
8502- breast adenocarcinoma [breast] AS601245 26572	JNKs	AS601245	Treatment => AS601245 vs DMSO	GSE70138.GPL20573.LINCS.test8502	https://www.ncbi.nlm.nih.gov/geo/query/acc.cgi?acc=GSE70138		-42.26			-10.56	10.56
9371- breast adenocarcinoma [breast] AT7519 27537	CDK	AT7519	Treatment => AT7519 vs DMSO	GSE70138.GPL20573.LINCS.test9371	https://www.ncbi.nlm.nih.gov/geo/query/acc.cgi?acc=GSE70138		42.26			10.56	10.56
25597- breast adenocarcinoma [breast] AT7519 17331	CDK	AT7519	Treatment => AT7519 vs DMSO	GSE70138.GPL20573.LINCS.test25597	https://www.ncbi.nlm.nih.gov/geo/query/acc.cgi?acc=GSE70138		-42.26			-10.56	10.56
9373- breast adenocarcinoma [breast] AT7519 27539	CDK	AT7519	Treatment => AT7519 vs DMSO	GSE70138.GPL20573.LINCS.test9373	https://www.ncbi.nlm.nih.gov/geo/query/acc.cgi?acc=GSE70138		42.26			10.56	10.56
9052- breast adenocarcinoma [breast] AT7519 27183	CDK	AT7519	Treatment => AT7519 vs DMSO	GSE70138.GPL20573.LINCS.test9052	https://www.ncbi.nlm.nih.gov/geo/query/acc.cgi?acc=GSE70138		-42.26			-10.56	10.56
7530- breast adenocarcinoma [breast] AT7867 25492	AKT1/2/3;p70S6K/PKA	AT7867	Treatment => AT7867 vs DMSO	GSE70138.GPL20573.LINCS.test7530	https://www.ncbi.nlm.nih.gov/geo/query/acc.cgi?acc=GSE70138		42.26			10.56	10.56
9354- breast adenocarcinoma [breast] AZD5438 27518	CDK	AZD5438	Treatment => AZD5438 vs DMSO	GSE70138.GPL20573.LINCS.test9354	https://www.ncbi.nlm.nih.gov/geo/query/acc.cgi?acc=GSE70138		42.26			10.56	10.56
18260- breast adenocarcinoma [breast] AZD6482 9180	PI3K beta	AZD6482	Treatment => AZD6482 vs DMSO	GSE70138.GPL20573.LINCS.test18260	https://www.ncbi.nlm.nih.gov/geo/query/acc.cgi?acc=GSE70138		42.26			10.56	10.56
9389- breast adenocarcinoma [breast] AZD7762 27556	CHK	AZD7762	Treatment => AZD7762 vs DMSO	GSE70138.GPL20573.LINCS.test9389	https://www.ncbi.nlm.nih.gov/geo/query/acc.cgi?acc=GSE70138		42.26			10.56	10.56
25730- breast adenocarcinoma [breast] AZD8055 17480	mTOR	AZD8055	Treatment => AZD8055 vs DMSO	GSE70138.GPL20573.LINCS.test25730	https://www.ncbi.nlm.nih.gov/geo/query/acc.cgi?acc=GSE70138		-42.26			-10.56	10.56
8887- breast adenocarcinoma [breast] AZD8055 26998	mTOR	AZD8055	Treatment => AZD8055 vs DMSO	GSE70138.GPL20573.LINCS.test8887	https://www.ncbi.nlm.nih.gov/geo/query/acc.cgi?acc=GSE70138		-42.26			-10.56	10.56
18271- breast adenocarcinoma [breast] AZD8055 9192	mTOR	AZD8055	Treatment => AZD8055 vs DMSO	GSE70138.GPL20573.LINCS.test18271	https://www.ncbi.nlm.nih.gov/geo/query/acc.cgi?acc=GSE70138		-42.26			-10.56	10.56
7791- breast adenocarcinoma [breast] belinostat 25781	HDACs	belinostat	Treatment => belinostat vs DMSO	GSE70138.GPL20573.LINCS.test7791	https://www.ncbi.nlm.nih.gov/geo/query/acc.cgi?acc=GSE70138		-42.26			-10.56	10.56
25789- breast adenocarcinoma [breast] BI2536 17544	PLK1	BI2536	Treatment => BI2536 vs DMSO	GSE70138.GPL20573.LINCS.test25789	https://www.ncbi.nlm.nih.gov/geo/query/acc.cgi?acc=GSE70138		42.26			10.56	10.56
3485- breast adenocarcinoma [breast] BIX01338 20997	histone methyltransferase	BIX01338	Treatment => BIX01338 vs DMSO	GSE70138.GPL20573.LINCS.test3485	https://www.ncbi.nlm.nih.gov/geo/query/acc.cgi?acc=GSE70138		42.26			10.56	10.56
25525- breast adenocarcinoma [breast] celastrol 17252	multiple targets	celastrol	Treatment => celastrol vs DMSO	GSE70138.GPL20573.LINCS.test25525	https://www.ncbi.nlm.nih.gov/geo/query/acc.cgi?acc=GSE70138		-42.26			-10.56	10.56
25527- breast adenocarcinoma [breast] celastrol 17254	multiple targets	celastrol	Treatment => celastrol vs DMSO	GSE70138.GPL20573.LINCS.test25527	https://www.ncbi.nlm.nih.gov/geo/query/acc.cgi?acc=GSE70138		-42.26			-10.56	10.56
8985- breast adenocarcinoma [breast] celastrol 27107	multiple targets	celastrol	Treatment => celastrol vs DMSO	GSE70138.GPL20573.LINCS.test8985	https://www.ncbi.nlm.nih.gov/geo/query/acc.cgi?acc=GSE70138		-42.26			-10.56	10.56
25526- breast adenocarcinoma [breast] celastrol 17253	multiple targets	celastrol	Treatment => celastrol vs DMSO	GSE70138.GPL20573.LINCS.test25526	https://www.ncbi.nlm.nih.gov/geo/query/acc.cgi?acc=GSE70138		-42.26			-10.56	10.56
9300- breast adenocarcinoma [breast] celastrol 27459	multiple targets	celastrol	Treatment => celastrol vs DMSO	GSE70138.GPL20573.LINCS.test9300	https://www.ncbi.nlm.nih.gov/geo/query/acc.cgi?acc=GSE70138		-42.26			-10.56	10.56
18663- breast adenocarcinoma [breast] celastrol 9627	multiple targets	celastrol	Treatment => celastrol vs DMSO	GSE70138.GPL20573.LINCS.test18663	https://www.ncbi.nlm.nih.gov/geo/query/acc.cgi?acc=GSE70138		-42.26			-10.56	10.56
8305- breast adenocarcinoma [breast] CGP60474 26353	CDK1;CDK2	CGP60474	Treatment => CGP60474 vs DMSO	GSE70138.GPL20573.LINCS.test8305	https://www.ncbi.nlm.nih.gov/geo/query/acc.cgi?acc=GSE70138		-42.26			-10.56	10.56
7248- breast adenocarcinoma [breast] CGP60474 25178	CDK1;CDK2	CGP60474	Treatment => CGP60474 vs DMSO	GSE70138.GPL20573.LINCS.test7248	https://www.ncbi.nlm.nih.gov/geo/query/acc.cgi?acc=GSE70138		-42.26			-10.56	10.56
8658- breast adenocarcinoma [breast] CGP60474 26744	CDK1;CDK2	CGP60474	Treatment => CGP60474 vs DMSO	GSE70138.GPL20573.LINCS.test8658	https://www.ncbi.nlm.nih.gov/geo/query/acc.cgi?acc=GSE70138		42.26			10.56	10.56
18095- breast adenocarcinoma [breast] CP466722 8996	ATM	CP466722	Treatment => CP466722 vs DMSO	GSE70138.GPL20573.LINCS.test18095	https://www.ncbi.nlm.nih.gov/geo/query/acc.cgi?acc=GSE70138		-42.26			-10.56	10.56
18093- breast adenocarcinoma [breast] CP466722 8994	ATM	CP466722	Treatment => CP466722 vs DMSO	GSE70138.GPL20573.LINCS.test18093	https://www.ncbi.nlm.nih.gov/geo/query/acc.cgi?acc=GSE70138		-42.26			-10.56	10.56
17952- breast adenocarcinoma [breast] crizotinib 8837	ALK and ROS1	crizotinib	Treatment => crizotinib vs DMSO	GSE70138.GPL20573.LINCS.test17952	https://www.ncbi.nlm.nih.gov/geo/query/acc.cgi?acc=GSE70138		-42.26			-10.56	10.56
24819- breast adenocarcinoma [breast] dasatinib 16467	SRC family	dasatinib	Treatment => dasatinib vs DMSO	GSE70138.GPL20573.LINCS.test24819	https://www.ncbi.nlm.nih.gov/geo/query/acc.cgi?acc=GSE70138		42.26			10.56	10.56
8612- breast adenocarcinoma [breast] dasatinib 26694	SRC family	dasatinib	Treatment => dasatinib vs DMSO	GSE70138.GPL20573.LINCS.test8612	https://www.ncbi.nlm.nih.gov/geo/query/acc.cgi?acc=GSE70138		42.26			10.56	10.56
25573- breast adenocarcinoma [breast] A443654 17305	AKT	A443654	Treatment => A443654 vs DMSO	GSE70138.GPL20573.LINCS.test25573	https://www.ncbi.nlm.nih.gov/geo/query/acc.cgi?acc=GSE70138		-37.8			-9.45	9.45
25877- breast adenocarcinoma [breast] A443654 17642	AKT	A443654	Treatment => A443654 vs DMSO	GSE70138.GPL20573.LINCS.test25877	https://www.ncbi.nlm.nih.gov/geo/query/acc.cgi?acc=GSE70138		-37.8			-9.45	9.45
25576- breast adenocarcinoma [breast] A443654 17308	AKT	A443654	Treatment => A443654 vs DMSO	GSE70138.GPL20573.LINCS.test25576	https://www.ncbi.nlm.nih.gov/geo/query/acc.cgi?acc=GSE70138		-37.8			-9.45	9.45
9031- breast adenocarcinoma [breast] A443654 27160	AKT	A443654	Treatment => A443654 vs DMSO	GSE70138.GPL20573.LINCS.test9031	https://www.ncbi.nlm.nih.gov/geo/query/acc.cgi?acc=GSE70138		-37.8			-9.45	9.45
18019- breast adenocarcinoma [breast] AEW541 8912	IGF-1R	AEW541	Treatment => AEW541 vs DMSO	GSE70138.GPL20573.LINCS.test18019	https://www.ncbi.nlm.nih.gov/geo/query/acc.cgi?acc=GSE70138		-37.8			-9.45	9.45
25179- breast adenocarcinoma [breast] AEW541 16867	IGF-1R	AEW541	Treatment => AEW541 vs DMSO	GSE70138.GPL20573.LINCS.test25179	https://www.ncbi.nlm.nih.gov/geo/query/acc.cgi?acc=GSE70138		-37.8			-9.45	9.45
25838- breast adenocarcinoma [breast] afatinib 17599	EGFR;HER2	afatinib	Treatment => afatinib vs DMSO	GSE70138.GPL20573.LINCS.test25838	https://www.ncbi.nlm.nih.gov/geo/query/acc.cgi?acc=GSE70138		37.8			9.45	9.45
18671- breast adenocarcinoma [breast] afatinib 9636	EGFR;HER2	afatinib	Treatment => afatinib vs DMSO	GSE70138.GPL20573.LINCS.test18671	https://www.ncbi.nlm.nih.gov/geo/query/acc.cgi?acc=GSE70138		-37.8			-9.45	9.45
9200- breast adenocarcinoma [breast] alvocidib 27348	CDK9	alvocidib	Treatment => alvocidib vs DMSO	GSE70138.GPL20573.LINCS.test9200	https://www.ncbi.nlm.nih.gov/geo/query/acc.cgi?acc=GSE70138		37.8			9.45	9.45
9198- breast adenocarcinoma [breast] alvocidib 27344	CDK9	alvocidib	Treatment => alvocidib vs DMSO	GSE70138.GPL20573.LINCS.test9198	https://www.ncbi.nlm.nih.gov/geo/query/acc.cgi?acc=GSE70138		37.8			9.45	9.45
8892- breast adenocarcinoma [breast] alvocidib 27004	CDK9	alvocidib	Treatment => alvocidib vs DMSO	GSE70138.GPL20573.LINCS.test8892	https://www.ncbi.nlm.nih.gov/geo/query/acc.cgi?acc=GSE70138		-37.8			-9.45	9.45
24970- breast adenocarcinoma [breast] apitolisib 16635	PI3K;mTOR	apitolisib	Treatment => apitolisib vs DMSO	GSE70138.GPL20573.LINCS.test24970	https://www.ncbi.nlm.nih.gov/geo/query/acc.cgi?acc=GSE70138		37.8			9.45	9.45
25420- breast adenocarcinoma [breast] AS601245 17136	JNKs	AS601245	Treatment => AS601245 vs DMSO	GSE70138.GPL20573.LINCS.test25420	https://www.ncbi.nlm.nih.gov/geo/query/acc.cgi?acc=GSE70138		-37.8			-9.45	9.45
25678- breast adenocarcinoma [breast] AS605240 17421	PI3K gamma	AS605240	Treatment => AS605240 vs DMSO	GSE70138.GPL20573.LINCS.test25678	https://www.ncbi.nlm.nih.gov/geo/query/acc.cgi?acc=GSE70138		37.8			9.45	9.45
9455- breast adenocarcinoma [breast] AS605240 27630	PI3K gamma	AS605240	Treatment => AS605240 vs DMSO	GSE70138.GPL20573.LINCS.test9455	https://www.ncbi.nlm.nih.gov/geo/query/acc.cgi?acc=GSE70138		37.8			9.45	9.45
25725- breast adenocarcinoma [breast] AT7519 17474	CDK	AT7519	Treatment => AT7519 vs DMSO	GSE70138.GPL20573.LINCS.test25725	https://www.ncbi.nlm.nih.gov/geo/query/acc.cgi?acc=GSE70138		-37.8			-9.45	9.45
7073- breast adenocarcinoma [breast] AT7519 24984	CDK	AT7519	Treatment => AT7519 vs DMSO	GSE70138.GPL20573.LINCS.test7073	https://www.ncbi.nlm.nih.gov/geo/query/acc.cgi?acc=GSE70138		-37.8			-9.45	9.45
9051- breast adenocarcinoma [breast] AT7519 27182	CDK	AT7519	Treatment => AT7519 vs DMSO	GSE70138.GPL20573.LINCS.test9051	https://www.ncbi.nlm.nih.gov/geo/query/acc.cgi?acc=GSE70138		-37.8			-9.45	9.45
9035- breast adenocarcinoma [breast] AZD5438 27164	CDK	AZD5438	Treatment => AZD5438 vs DMSO	GSE70138.GPL20573.LINCS.test9035	https://www.ncbi.nlm.nih.gov/geo/query/acc.cgi?acc=GSE70138		37.8			9.45	9.45
18417- breast adenocarcinoma [breast] AZD5438 9354	CDK	AZD5438	Treatment => AZD5438 vs DMSO	GSE70138.GPL20573.LINCS.test18417	https://www.ncbi.nlm.nih.gov/geo/query/acc.cgi?acc=GSE70138		-37.8			-9.45	9.45
7056- breast adenocarcinoma [breast] AZD5438 24965	CDK	AZD5438	Treatment => AZD5438 vs DMSO	GSE70138.GPL20573.LINCS.test7056	https://www.ncbi.nlm.nih.gov/geo/query/acc.cgi?acc=GSE70138		-37.8			-9.45	9.45
7091- breast adenocarcinoma [breast] AZD7762 25004	CHK	AZD7762	Treatment => AZD7762 vs DMSO	GSE70138.GPL20573.LINCS.test7091	https://www.ncbi.nlm.nih.gov/geo/query/acc.cgi?acc=GSE70138		37.8			9.45	9.45
25612- breast adenocarcinoma [breast] AZD7762 17349	CHK	AZD7762	Treatment => AZD7762 vs DMSO	GSE70138.GPL20573.LINCS.test25612	https://www.ncbi.nlm.nih.gov/geo/query/acc.cgi?acc=GSE70138		-37.8			-9.45	9.45
8888- breast adenocarcinoma [breast] AZD8055 26999	mTOR	AZD8055	Treatment => AZD8055 vs DMSO	GSE70138.GPL20573.LINCS.test8888	https://www.ncbi.nlm.nih.gov/geo/query/acc.cgi?acc=GSE70138		-37.8			-9.45	9.45
18268- breast adenocarcinoma [breast] AZD8055 9188	mTOR	AZD8055	Treatment => AZD8055 vs DMSO	GSE70138.GPL20573.LINCS.test18268	https://www.ncbi.nlm.nih.gov/geo/query/acc.cgi?acc=GSE70138		-37.8			-9.45	9.45
18059- breast adenocarcinoma [breast] AZD8330 8956	MEK	AZD8330	Treatment => AZD8330 vs DMSO	GSE70138.GPL20573.LINCS.test18059	https://www.ncbi.nlm.nih.gov/geo/query/acc.cgi?acc=GSE70138		37.8			9.45	9.45
7790- breast adenocarcinoma [breast] belinostat 25780	HDACs	belinostat	Treatment => belinostat vs DMSO	GSE70138.GPL20573.LINCS.test7790	https://www.ncbi.nlm.nih.gov/geo/query/acc.cgi?acc=GSE70138		-37.8			-9.45	9.45
3478- breast adenocarcinoma [breast] belinostat 20989	HDACs	belinostat	Treatment => belinostat vs DMSO	GSE70138.GPL20573.LINCS.test3478	https://www.ncbi.nlm.nih.gov/geo/query/acc.cgi?acc=GSE70138		37.8			9.45	9.45
8811- breast adenocarcinoma [breast] BEZ235 26915	PI3K;mTOR	BEZ235	Treatment => BEZ235 vs DMSO	GSE70138.GPL20573.LINCS.test8811	https://www.ncbi.nlm.nih.gov/geo/query/acc.cgi?acc=GSE70138		-37.8			-9.45	9.45
18618- breast adenocarcinoma [breast] BI2536 9577	PLK1	BI2536	Treatment => BI2536 vs DMSO	GSE70138.GPL20573.LINCS.test18618	https://www.ncbi.nlm.nih.gov/geo/query/acc.cgi?acc=GSE70138		-37.8			-9.45	9.45
17747- breast adenocarcinoma [breast] BKM120 8609	PI3K	BKM120	Treatment => BKM120 vs DMSO	GSE70138.GPL20573.LINCS.test17747	https://www.ncbi.nlm.nih.gov/geo/query/acc.cgi?acc=GSE70138		-37.8			-9.45	9.45
8929- breast adenocarcinoma [breast] BMS345541 27045	IKKbeta;IKKalpha	BMS345541	Treatment => BMS345541 vs DMSO	GSE70138.GPL20573.LINCS.test8929	https://www.ncbi.nlm.nih.gov/geo/query/acc.cgi?acc=GSE70138		-37.8			-9.45	9.45
26028- breast adenocarcinoma [breast] canertinib 17811	EGFR;HER2;ErbB4	canertinib	Treatment => canertinib vs DMSO	GSE70138.GPL20573.LINCS.test26028	https://www.ncbi.nlm.nih.gov/geo/query/acc.cgi?acc=GSE70138		37.8			9.45	9.45
9319- breast adenocarcinoma [breast] canertinib 27479	EGFR;HER2;ErbB4	canertinib	Treatment => canertinib vs DMSO	GSE70138.GPL20573.LINCS.test9319	https://www.ncbi.nlm.nih.gov/geo/query/acc.cgi?acc=GSE70138		-37.8			-9.45	9.45
26029- breast adenocarcinoma [breast] canertinib 17812	EGFR;HER2;ErbB4	canertinib	Treatment => canertinib vs DMSO	GSE70138.GPL20573.LINCS.test26029	https://www.ncbi.nlm.nih.gov/geo/query/acc.cgi?acc=GSE70138		37.8			9.45	9.45
18363- breast adenocarcinoma [breast] celastrol 9294	multiple targets	celastrol	Treatment => celastrol vs DMSO	GSE70138.GPL20573.LINCS.test18363	https://www.ncbi.nlm.nih.gov/geo/query/acc.cgi?acc=GSE70138		-37.8			-9.45	9.45
9299- breast adenocarcinoma [breast] celastrol 27456	multiple targets	celastrol	Treatment => celastrol vs DMSO	GSE70138.GPL20573.LINCS.test9299	https://www.ncbi.nlm.nih.gov/geo/query/acc.cgi?acc=GSE70138		-37.8			-9.45	9.45
25834- breast adenocarcinoma [breast] celastrol 17595	multiple targets	celastrol	Treatment => celastrol vs DMSO	GSE70138.GPL20573.LINCS.test25834	https://www.ncbi.nlm.nih.gov/geo/query/acc.cgi?acc=GSE70138		37.8			9.45	9.45
8546- breast adenocarcinoma [breast] CGP60474 26620	CDK1;CDK2	CGP60474	Treatment => CGP60474 vs DMSO	GSE70138.GPL20573.LINCS.test8546	https://www.ncbi.nlm.nih.gov/geo/query/acc.cgi?acc=GSE70138		-37.8			-9.45	9.45
8660- breast adenocarcinoma [breast] CGP60474 26747	CDK1;CDK2	CGP60474	Treatment => CGP60474 vs DMSO	GSE70138.GPL20573.LINCS.test8660	https://www.ncbi.nlm.nih.gov/geo/query/acc.cgi?acc=GSE70138		37.8			9.45	9.45
18028- breast adenocarcinoma [breast] CGP60474 8922	CDK1;CDK2	CGP60474	Treatment => CGP60474 vs DMSO	GSE70138.GPL20573.LINCS.test18028	https://www.ncbi.nlm.nih.gov/geo/query/acc.cgi?acc=GSE70138		37.8			9.45	9.45
18092- breast adenocarcinoma [breast] CP466722 8993	ATM	CP466722	Treatment => CP466722 vs DMSO	GSE70138.GPL20573.LINCS.test18092	https://www.ncbi.nlm.nih.gov/geo/query/acc.cgi?acc=GSE70138		-37.8			-9.45	9.45
8366- breast adenocarcinoma [breast] CP466722 26420	ATM	CP466722	Treatment => CP466722 vs DMSO	GSE70138.GPL20573.LINCS.test8366	https://www.ncbi.nlm.nih.gov/geo/query/acc.cgi?acc=GSE70138		37.8			9.45	9.45
17938- breast adenocarcinoma [breast] CP724714 8821	HER2	CP724714	Treatment => CP724714 vs DMSO	GSE70138.GPL20573.LINCS.test17938	https://www.ncbi.nlm.nih.gov/geo/query/acc.cgi?acc=GSE70138		-37.8			-9.45	9.45
17947- breast adenocarcinoma [breast] crizotinib 8831	ALK and ROS1	crizotinib	Treatment => crizotinib vs DMSO	GSE70138.GPL20573.LINCS.test17947	https://www.ncbi.nlm.nih.gov/geo/query/acc.cgi?acc=GSE70138		-37.8			-9.45	9.45
24818- breast adenocarcinoma [breast] dasatinib 16466	SRC family	dasatinib	Treatment => dasatinib vs DMSO	GSE70138.GPL20573.LINCS.test24818	https://www.ncbi.nlm.nih.gov/geo/query/acc.cgi?acc=GSE70138		37.8			9.45	9.45
7637- breast adenocarcinoma [breast] active JQ1 25610	BET bromodomain	active JQ1	Treatment => active JQ1 vs DMSO	GSE70138.GPL20573.LINCS.test7637	https://www.ncbi.nlm.nih.gov/geo/query/acc.cgi?acc=GSE70138			-37.08		-9.27	9.27
8586- breast adenocarcinoma [breast] AKT inhibitor VIII 26664	AKT	AKT inhibitor VIII	Treatment => AKT inhibitor VIII vs DMSO	GSE70138.GPL20573.LINCS.test8586	https://www.ncbi.nlm.nih.gov/geo/query/acc.cgi?acc=GSE70138			37.08		9.27	9.27
18252- breast adenocarcinoma [breast] barasertib 9171	Aurora B	barasertib	Treatment => barasertib vs DMSO	GSE70138.GPL20573.LINCS.test18252	https://www.ncbi.nlm.nih.gov/geo/query/acc.cgi?acc=GSE70138			37.08		9.27	9.27
25480- breast adenocarcinoma [breast] BI2536 17202	PLK1	BI2536	Treatment => BI2536 vs DMSO	GSE70138.GPL20573.LINCS.test25480	https://www.ncbi.nlm.nih.gov/geo/query/acc.cgi?acc=GSE70138			37.08		9.27	9.27
25230- breast adenocarcinoma [breast] BKM120 16925	PI3K	BKM120	Treatment => BKM120 vs DMSO	GSE70138.GPL20573.LINCS.test25230	https://www.ncbi.nlm.nih.gov/geo/query/acc.cgi?acc=GSE70138			-37.08		-9.27	9.27
25015- breast adenocarcinoma [breast] BEZ235 16686	PI3K;mTOR	BEZ235	Treatment => BEZ235 vs DMSO	GSE70138.GPL20573.LINCS.test25015	https://www.ncbi.nlm.nih.gov/geo/query/acc.cgi?acc=GSE70138		-35.71			-8.93	8.93
24971- breast adenocarcinoma [breast] apitolisib 16636	PI3K;mTOR	apitolisib	Treatment => apitolisib vs DMSO	GSE70138.GPL20573.LINCS.test24971	https://www.ncbi.nlm.nih.gov/geo/query/acc.cgi?acc=GSE70138			35.36		8.84	8.84
7224- breast adenocarcinoma [breast] A66 25152	PI3K	A66	Treatment => A66 vs DMSO	GSE70138.GPL20573.LINCS.test7224	https://www.ncbi.nlm.nih.gov/geo/query/acc.cgi?acc=GSE70138			32.27		8.07	8.07
17668- breast adenocarcinoma [breast] AKT inhibitor VIII 8521	AKT	AKT inhibitor VIII	Treatment => AKT inhibitor VIII vs DMSO	GSE70138.GPL20573.LINCS.test17668	https://www.ncbi.nlm.nih.gov/geo/query/acc.cgi?acc=GSE70138		-30.86			-7.72	7.72
25732- breast adenocarcinoma [breast] alvocidib 17482	CDK9	alvocidib	Treatment => alvocidib vs DMSO	GSE70138.GPL20573.LINCS.test25732	https://www.ncbi.nlm.nih.gov/geo/query/acc.cgi?acc=GSE70138		-30.86			-7.72	7.72
25058- breast adenocarcinoma [breast] AS601245 16733	JNKs	AS601245	Treatment => AS601245 vs DMSO	GSE70138.GPL20573.LINCS.test25058	https://www.ncbi.nlm.nih.gov/geo/query/acc.cgi?acc=GSE70138		-30.86			-7.72	7.72
25616- breast adenocarcinoma [breast] AZD7762 17353	CHK	AZD7762	Treatment => AZD7762 vs DMSO	GSE70138.GPL20573.LINCS.test25616	https://www.ncbi.nlm.nih.gov/geo/query/acc.cgi?acc=GSE70138			-27.39		-6.85	6.85
25014- breast adenocarcinoma [breast] BEZ235 16685	PI3K;mTOR	BEZ235	Treatment => BEZ235 vs DMSO	GSE70138.GPL20573.LINCS.test25014	https://www.ncbi.nlm.nih.gov/geo/query/acc.cgi?acc=GSE70138		-25.35			-6.34	6.34
25385- breast adenocarcinoma [breast] AS601245 17096	JNKs	AS601245	Treatment => AS601245 vs DMSO	GSE70138.GPL20573.LINCS.test25385	https://www.ncbi.nlm.nih.gov/geo/query/acc.cgi?acc=GSE70138			22.36		5.59	5.59
18225- breast adenocarcinoma [breast] AS601245 9141	JNKs	AS601245	Treatment => AS601245 vs DMSO	GSE70138.GPL20573.LINCS.test18225	https://www.ncbi.nlm.nih.gov/geo/query/acc.cgi?acc=GSE70138			22.36		5.59	5.59
25900- breast adenocarcinoma [breast] AT7519 17669	CDK	AT7519	Treatment => AT7519 vs DMSO	GSE70138.GPL20573.LINCS.test25900	https://www.ncbi.nlm.nih.gov/geo/query/acc.cgi?acc=GSE70138			22.36		5.59	5.59
7059- breast adenocarcinoma [breast] AZD5438 24968	CDK	AZD5438	Treatment => AZD5438 vs DMSO	GSE70138.GPL20573.LINCS.test7059	https://www.ncbi.nlm.nih.gov/geo/query/acc.cgi?acc=GSE70138			22.36		5.59	5.59
25582- breast adenocarcinoma [breast] AZD5438 17315	CDK	AZD5438	Treatment => AZD5438 vs DMSO	GSE70138.GPL20573.LINCS.test25582	https://www.ncbi.nlm.nih.gov/geo/query/acc.cgi?acc=GSE70138			22.36		5.59	5.59
25784- breast adenocarcinoma [breast] BI2536 17539	PLK1	BI2536	Treatment => BI2536 vs DMSO	GSE70138.GPL20573.LINCS.test25784	https://www.ncbi.nlm.nih.gov/geo/query/acc.cgi?acc=GSE70138			-22.36		-5.59	5.59
7819- breast adenocarcinoma [breast] daminozide 25812	JMJC	daminozide	Treatment => daminozide vs DMSO	GSE70138.GPL20573.LINCS.test7819	https://www.ncbi.nlm.nih.gov/geo/query/acc.cgi?acc=GSE70138			22.36		5.59	5.59
25026- breast adenocarcinoma [breast] alpelisib 16698	PI3K alpha	alpelisib	Treatment => alpelisib vs DMSO	GSE70138.GPL20573.LINCS.test25026	https://www.ncbi.nlm.nih.gov/geo/query/acc.cgi?acc=GSE70138		-18.9			-4.72	4.72
17870- breast adenocarcinoma [breast] alpelisib 8746	PI3K alpha	alpelisib	Treatment => alpelisib vs DMSO	GSE70138.GPL20573.LINCS.test17870	https://www.ncbi.nlm.nih.gov/geo/query/acc.cgi?acc=GSE70138		18.9			4.72	4.72
18560- breast adenocarcinoma [breast] alvocidib 9513	CDK9	alvocidib	Treatment => alvocidib vs DMSO	GSE70138.GPL20573.LINCS.test18560	https://www.ncbi.nlm.nih.gov/geo/query/acc.cgi?acc=GSE70138		-18.9			-4.72	4.72
17818- breast adenocarcinoma [breast] apitolisib 8688	PI3K;mTOR	apitolisib	Treatment => apitolisib vs DMSO	GSE70138.GPL20573.LINCS.test17818	https://www.ncbi.nlm.nih.gov/geo/query/acc.cgi?acc=GSE70138		-18.9			-4.72	4.72
8814- breast adenocarcinoma [breast] BEZ235 26918	PI3K;mTOR	BEZ235	Treatment => BEZ235 vs DMSO	GSE70138.GPL20573.LINCS.test8814	https://www.ncbi.nlm.nih.gov/geo/query/acc.cgi?acc=GSE70138		-18.9			-4.72	4.72
17749- breast adenocarcinoma [breast] BKM120 8611	PI3K	BKM120	Treatment => BKM120 vs DMSO	GSE70138.GPL20573.LINCS.test17749	https://www.ncbi.nlm.nih.gov/geo/query/acc.cgi?acc=GSE70138		18.9			4.72	4.72
25424- breast adenocarcinoma [breast] AZD8055 17140	mTOR	AZD8055	Treatment => AZD8055 vs DMSO	GSE70138.GPL20573.LINCS.test25424	https://www.ncbi.nlm.nih.gov/geo/query/acc.cgi?acc=GSE70138		-15.43			-3.86	3.86
